# Supplementary material for: Bioinformatics Analysis, Expression Profiling, and Functional Characterization of Heat Shock Proteins in Wolfi-poria cocos
Source: MDPI journal article supplement (doi:10.3390/bioengineering10030390), 2023-03-22
Supplement: s1 [file s1]

## Supplementary Materials

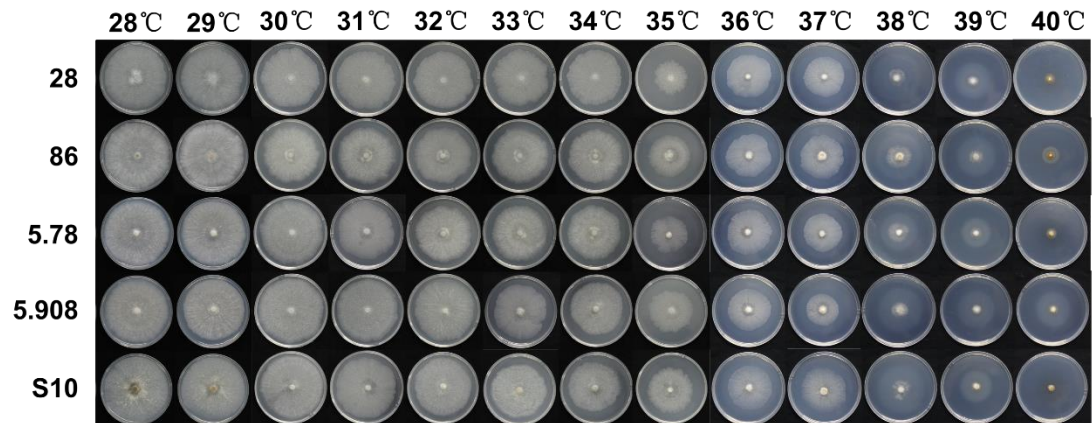

**Figure S1.** Growth of *W. cocos* strains mycelium at different temperatures

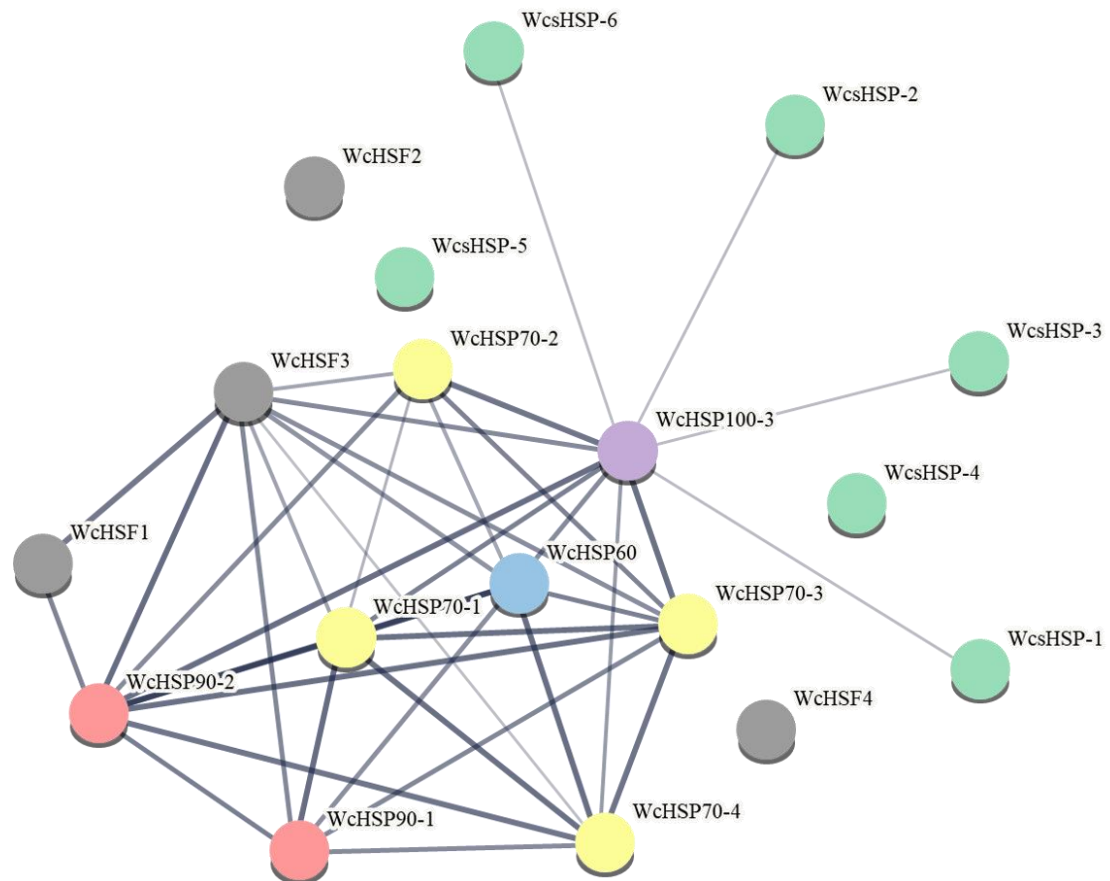

**Figure S2.** Interaction network analysis of WcHSPs and WcHSFs by prediction. Black, green, blue, yellow, red, and purple denotes WcHSF, WcsHSP, WcHSP60, WcHSP70, WcHSP90, and WcHSP100, respectively. For prediction of protein-protein online program STRING (<https://string-db.org/>) was used.

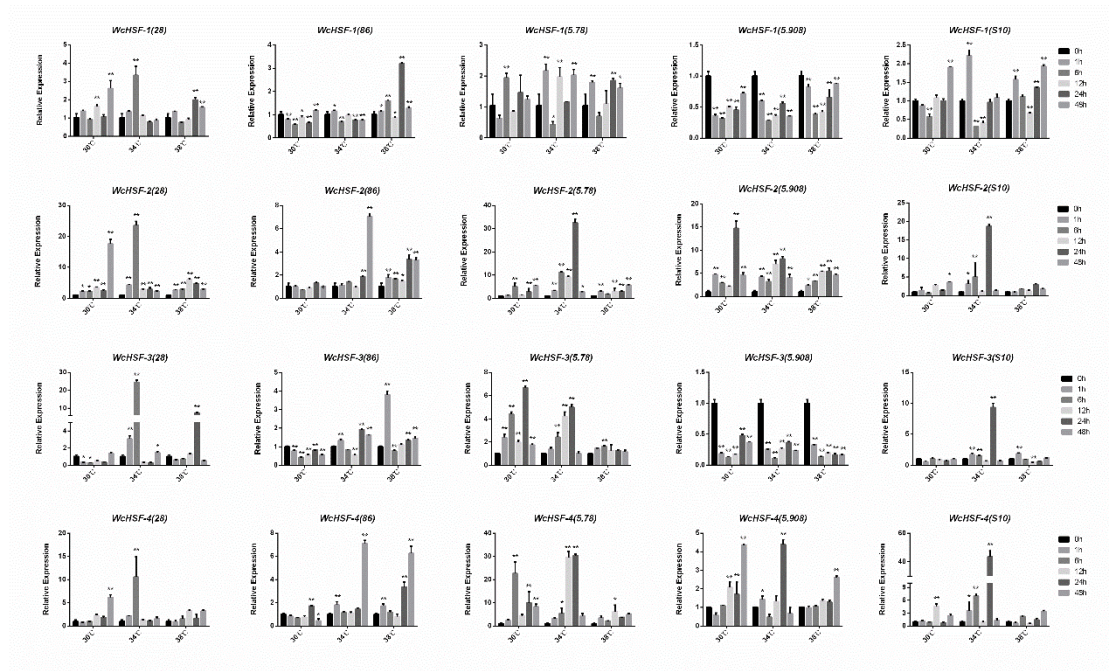

**Figure S3.** Analysis of expression patterns of *WcHSFs* gene under different temperature treatments. '28', '86', '5.78', '5.908', and 'S10' are different strains of *W.cocos*. All data are means  $\pm$  SD of three technical replicates, take the 0h sample as control, two-way ANOVA was employed to analyze the data and significant differences are represented by asterisks: \*,  $p < 0.05$ ; \*\*,  $p < 0.01$ .

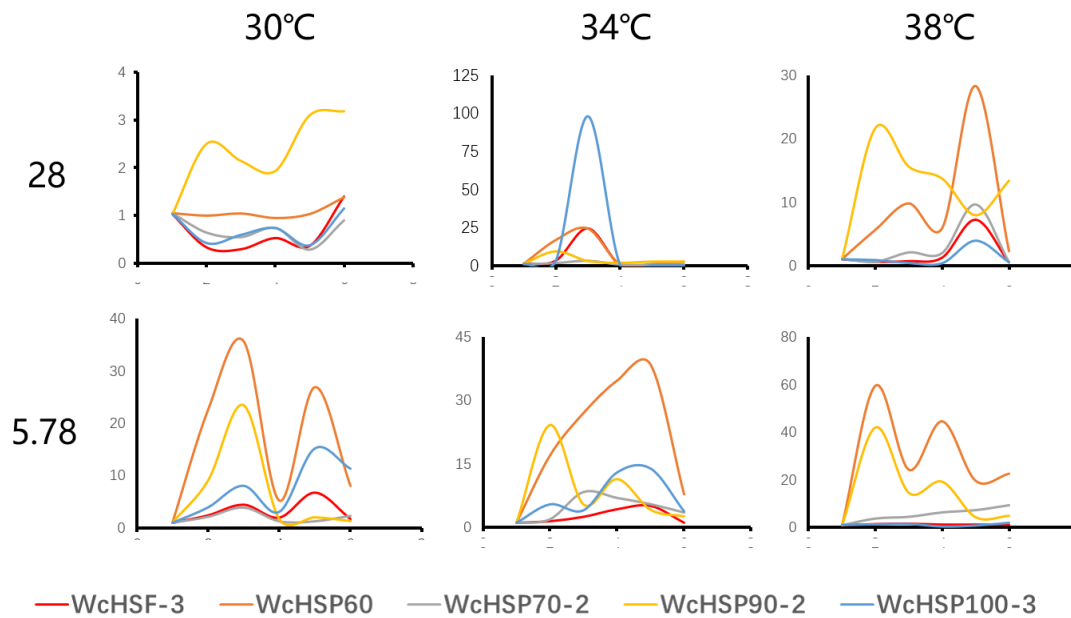

**Figure S4.** Co-expression analysis of *WcHSF3* and *WcHSP60*, *WcHSP70-2*, *WcHSP90-2*, *WcHSP100-3*.

**Table S1.** Gene information.

| <b>Classification</b> | <b>Gene name</b>    | <b>Gene ID</b>   |
|-----------------------|---------------------|------------------|
| HSF                   | <i>WcHSF-1</i>      | Cluster-960.3075 |
|                       | <i>WcHSF-2</i>      | Cluster-960.3449 |
|                       | <i>WcHSF-3</i>      | Cluster-960.3695 |
|                       | <i>WcHSF-4</i>      | Cluster-960.4433 |
| sHSP                  | <i>WcsHSP-1</i>     | Cluster-960.3159 |
|                       | <i>WcsHSP-2</i>     | Cluster-960.3342 |
|                       | <i>WcsHSP-3</i>     | Cluster-889.0    |
|                       | <i>WcsHSP-4</i>     | Cluster-960.3369 |
|                       | <i>WcsHSP-5</i>     | Cluster-960.3768 |
|                       | <i>WcsHSP-6</i>     | Cluster-960.4799 |
|                       | <i>TpsHSP-1</i>     | OJT14810.1       |
|                       | <i>MD-WcsHSP-1</i>  | PCH42765.1       |
|                       | <i>MD-WcsHSP-2</i>  | PCH42744.1       |
|                       | <i>MD-WcsHSP-3</i>  | PCH38688.1       |
|                       | <i>MD-WcsHSP-4</i>  | PCH38030.1       |
|                       | <i>MD-WcsHSP-5</i>  | PCH36592.1       |
|                       | <i>MD-WcsHSP-6</i>  | PCH34468.1       |
|                       | <i>MD-WcsHSP-7</i>  | PCH34056.1       |
|                       | <i>GfsHSP-1</i>     | OBZ74880.1       |
|                       | <i>LesHSP</i>       | GAW02286.1       |
|                       | <i>ScsHSP</i>       | AAA79010.1       |
|                       | <i>HmsHSP</i>       | RDB20963.1       |
|                       | <i>LesHSP-1</i>     | GAW02286.1       |
|                       | <i>TmsHSP</i>       | KAF8237894.1     |
|                       | <i>PnsHSP-1</i>     | PAV22864.1       |
| HSP60                 | <i>WcHSP60</i>      | Cluster-960.5154 |
|                       | <i>TpHSP60</i>      | OJT02927.1       |
|                       | <i>GfHSP60</i>      | OBZ72799.1       |
|                       | <i>LeHSP60</i>      | GAW09714.1       |
|                       | <i>ScHSP60</i>      | AAA34690.1       |
|                       | <i>HmHSP60</i>      | RDB24487.1       |
| HSP70                 | <i>WcHSP70-1</i>    | Cluster-960.3470 |
|                       | <i>WcHSP70-2</i>    | Cluster-960.3529 |
|                       | <i>WcHSP70-3</i>    | Cluster-960.5228 |
|                       | <i>WcHSP70-4</i>    | Cluster-960.6601 |
|                       | <i>MD-WcHSP70-1</i> | PCH35569.1       |
|                       | <i>MD-WcHSP70-2</i> | PCH43031.1       |
|                       | <i>MD-WcHSP70-3</i> | PCH38384.1       |
|                       | <i>MD-WcHSP70-4</i> | PCH35950.1       |
|                       | <i>TpHSP70</i>      | OJT15625.1       |
|                       | <i>GfHSP70</i>      | OBZ69999.1       |
|                       | <i>RsHSP70</i>      | CUA66922.1       |
|                       | <i>LeHSP70</i>      | GAW04349.1       |
|                       | <i>ScHSP70</i>      | AAA35099.1       |
|                       | <i>HmHSP70</i>      | RDB25126.1       |
|                       | <i>TmHSP70</i>      | KAF8235873.1     |

|        |                      |                  |
|--------|----------------------|------------------|
|        | <i>PnHSP70</i>       | PAV24310.1       |
|        | <i>OsHSP70</i>       | EQL03305.1       |
| HSP90  | <i>WcHSP90-1</i>     | Cluster-960.2162 |
|        | <i>WcHSP90-2</i>     | Cluster-960.4365 |
|        | <i>MD- WcHSP90-1</i> | PCH41165.1       |
|        | <i>MD- WcHSP90-2</i> | PCH38044.1       |
|        | <i>TpHSP90</i>       | OJT15706.1       |
|        | <i>RsHSP90</i>       | CUA70109.1       |
|        | <i>LeHSP90</i>       | GAW05303.1       |
|        | <i>HmHSP90</i>       | RDB24182.1       |
|        | <i>PnHSP90</i>       | PAV23670.1       |
|        | <i>OsHSP90</i>       | EQL00771.1       |
| HSP100 | <i>WcHSP100-1</i>    | Cluster-960.3653 |
|        | <i>WcHSP100-2</i>    | Cluster-960.3911 |
|        | <i>WcHSP100-3</i>    | Cluster-960.4077 |
|        | <i>TpHSP100</i>      | OJT15823.1       |
|        | <i>RsHSP100</i>      | CUA76670.1       |
|        | <i>LeHSP100</i>      | GAW03650.1       |
|        | <i>PnHSP100</i>      | PAV22376.1       |

**Table S2.** Amino acid sequence of the WcHSPs and WcHSFs in ‘28’ strains.

| Gene name | Amino acid sequence                                                                                                                                                                                                                                                                                                                                                                                                                                                                                                                                                                                                                                                                                                        |
|-----------|----------------------------------------------------------------------------------------------------------------------------------------------------------------------------------------------------------------------------------------------------------------------------------------------------------------------------------------------------------------------------------------------------------------------------------------------------------------------------------------------------------------------------------------------------------------------------------------------------------------------------------------------------------------------------------------------------------------------------|
| WcsHSP-1  | MSLSFFYEPFYTLADFDRLFDEAFSARTGPRGQSADRQVQRQDSSTRFLRPRMDLHEDAQANAVTATFELPGLNKEN<br>VNIDVHNGVLTVSGEAQVQSDRDEHGYAVRERRYGKFSRAVPLPQGKVEDIRASMENGVLTVTFPKTTPETAPKKITI<br>S                                                                                                                                                                                                                                                                                                                                                                                                                                                                                                                                                       |
| WcsHSP-2  | MSYPHFFYDPFAEFNRLLDDALTERNVGYPPQGQAKYSAAPIIAALHGLGEREPQGPELTSAHIDITRCRMDVHENSQTN<br>QVEATFELPGLRKEDVSIDVHNNRLTVSGESKQSTERNEAGYAVRERQYGKFSRTLQLPAGINTNDIKASMENGLLTVS<br>FPRAAPQEGPKRITVS                                                                                                                                                                                                                                                                                                                                                                                                                                                                                                                                    |
| WcsHSP-3  | MSLTSFFYQPFYSLADFDRLFNEAFSARTNPANTNGDRQVQRQESSRLLRPRMDLHEENVVTATLELPGISKENVQID<br>VYNGVLNVSGESRLFSDRDENGAVRERRYGKFSRAIPLPQGIKVSAPQRKVKNCP                                                                                                                                                                                                                                                                                                                                                                                                                                                                                                                                                                                  |
| WcsHSP-4  | MANHALNLNPPNADLHISTHGSDWLWAAFSVFAFSLVMIVLDLLRPRGTRLFHQLAVIILATFTIGYFSMASDLGATPI<br>AVEFRGHGSDPTRQIWIYVRYIQWFITPLSLLEVLLATGLSLSDITTLFMAIVVVVCGLVGALVHSTYKWGYVFGVA<br>ALFYIWIYVLLWHGAQTTFPGGGVLRPGYLRAGFLAFLMLITYPICWACSEGGNVISNTSEMIWYGILDILAGPGLFFF<br>LWHLRDVDYATFGLSSGKYTDAEKVGA                                                                                                                                                                                                                                                                                                                                                                                                                                         |
| WcsHSP-5  | MAGNQAVNINPPNANENLTKQGSDWLWAAFSLSLSLLVAVVVTFLRPRGTRLFHQIAVVVLAVSSITYFSLASDLGAT<br>PIAVEFRGHGDPTRQIWIYVRYIQWFINPLLLLELLLATGLPLSDIMTTLFMAIVVVVCGLVGALVHSTYKWGYVFG<br>CTALIYIYIYALLWHAPSSTFAAGGVVRRGYLLAAGYFAFLMLITYPICWACAEGGNVITVDSDMIWYGILDCLTIPVFLA<br>FFLWEIRDVDYNAFGLHSGKFVAHNAASAKAAEAGEAAPVAASEAGAQQS                                                                                                                                                                                                                                                                                                                                                                                                                 |
| WcsHSP-6  | MSLSRFLYEPFYSLADFDRLFDEAFSRTNGGSDNTAVSRTLPRMDLHQDEKANTVTATFELPGLKKEDVEINVHNNV<br>LTVSGESNISSDRDENGAVRERRYGKFSRALSLPQGIKVS GAYLSIVD                                                                                                                                                                                                                                                                                                                                                                                                                                                                                                                                                                                         |
| WcHSP60   | MDLRRGSQAAVDRVVAFLAAHTKTITTTAEIAQVATISANGDTHVGNLIAQAMEKVGKEGVITVKEGRTIDDEIEITEG<br>MRFDGRGIFISPYFVTDVKSQKVDFEKPLVLLSEKKISRLQDVIPALEAAAQARRPLLLIAEDVDGEALAACLVNKLRGQL<br>QVCAVKAPGFGDNRSILGDLAILTGAQVFTELDLMKLEQLTPDMLGSSGSITITKEDTIILNGEGSKDAIQSRCEQIRSL<br>IDDRTTSDYDRTKLQERLAKLSGGVAVIKVGSSEVEVGEKKDRYDDALNATRAAVEEGILPGGGVALLKASLALASA<br>PGSKPASTAPDAKPIPTANFDQDLGVSIKRALTYPSRTILKNAGEESSVIVGTLLANYGSPDKFSWGYDASKGEYVDMI<br>KAGIVDPLKVVRTALVDAAGVASLLTSEACVVEAEKDKGGAGAGMGAGMGGMGMGMG                                                                                                                                                                                                                                  |
| WcHSP70-1 | MSLPRRPTRRQSRVSSLSLAFFAFLALFLLCPAATANEDKRSEYGTVIGIDLGTYSVGVQGRGRVEIANDQGHRI<br>TPSWVSFSDEERLVGDAAKHAFHSNPENTVFDAKRLIGRKVDDPEIKRDQKHWPFKVVSKNDKPAIQVKHARGEARDF<br>TPEEISAMVLGKMKETAESYLGPVTHAVVTPAYFNDAQRQATKDAGTIAGLQVLRINEPTAAAIAYGLDKKGGES<br>QHIVYDLGGGTFDVSLSIDDGVFEVLATAGDTHLGGEDFDNRVMDYLIKQYKKKTGTDVASNLRAMGKLKREVEKA<br>KRTLSSQQSTRIEIESFENGDNDFSETLTRAKEELNMDLFRKTMKPVEQLKDANLKKEDIDEIVLVGGSTRIPKVQQLL<br>KEYFGKEPSKGINPDEAVAYGAAVQGGILSGDENLGDIVLVDVCPLTLGIETTGGVMTKLIPRNTVIPTRKSQIFSTAADN<br>QPTVLIQVYEGERSLTKDNNLLGKFELSGIPPAPRGVPQIEVTFEIDANGIMRISAVDKGTGKSESVTITNEKGRLSPREEIE<br>RMVKEAEFEAAEDEAQRKRIEALNSLSSFVYGLKTQLGDQEGGLGKLNDEDKKILTDAVKETTDWIDDYQGSATAED<br>LEEKLADVQRTVNPITSKLYSGGGTDYSAGAEDEDIHSHDEL |
| WcHSP70-2 | MEDVFDGAIGIDLGTYSVGVWQNDRVEIANDQGNRTTPSYVAFSAEERLIGDAAKNQAAAMPNTIFDAKRLIGR<br>RYDDPDVKKDMIHWPFAVVEKDGSLIKVEYLGEKTFSPQEISSMVLTKMKEISEAKLGKTVKKAVVTPAYFNDSQ<br>RLATKDAGAIAGLDVLRIINEPTAAAIAYGLDRQSSAEKNVLIFDLGGGTFDVSLNITGGVFAVKATAGDTHLGGEDFD<br>NNLLEHFKEFKRKTCLDISEDARALRRLRSACERAKRTLSSVTQTTFEVDLSLFQGEDFSANITRAFEEINASLFKSTV<br>EPVERVLKDAKMPREKVDDIVLVGGSTRIPKISLVSEYFGGRQLNKSINPDEAVAYGAAVQAAVLTGQTSKDTADLLL<br>LDVAPLSLGVAMQGDIFGIVVPRNTPIPTNKSRTFTTVEDNQTTVTFPVYEGERTQCRDNRLLEGELTGIPPMRGQAE<br>LVTTFEVDANGLLKVTAQDRASGRKAQISITNSVGRLSAEIEQMIKDAEQFKQADKDFSARHEAKSDLESYIHQVENT<br>ITSPDLGMKLRGAKAQVEAELARALEKLEIEDSTADELRKAQLGIKRALQKATAGIR                                                                         |

WcHSP70-3

MAVVGIDLGALHSKIGVARHRGIDIIVNEVSNRATPSLVSGVKQRAIGEAAKTLETSNFRNTIGGLKRLIGRTFQDPEIQ  
EVEKKFINATLIDVGGTVGVQVQYLGGEQRQFSITQVLAMYLGLKLRDTAANELKSGVTDIVITVPGWYTDVQRRRAVL  
AAQIAGLNVRLINDTTAIALGYGITKSDLPEAENPRHVVFVDVGHSSSTSCAVVAFSGQLTVKSTAYDRHAGGRDIDY  
ALVRHFASEFTDKYKIDVLSSPKATFRLAAGCDRVKKVLSANAEAPLNVESIMNDVDATSRLSREEYERLIAGVLDRIP  
GPLQQALADSGLTIDQIDAVELVGGCTRIPAVRAKIQSVFEGKVLSTTLNQDEAAARGATFACAMLSPVFVRDRFSMHD  
ITPYSIKVQWERQPDDTDDDELVVFPKNSIPSTKVLTFYRKQAFDIQAQYADPAALPGGINPWIAFRTAKSVGPDENG  
DFACVCLKTRLNLHGVMSEAAAYVEEIEEKEETMQVDGEEAPKKKIVRKKDVPFVWAGTSLDVSVDKFKEQEAQ  
MHAADKLVKDTEDRKNAL EEYVYDTRGRLDERYASYVKADEKERLLAALQDAEDWLYTEEGEDATKSAYVERLDA  
LKKLGDPIITFRYREAEERSRVVAQLRETINSYMGQATSGEERFAHIDAADLQAVVEKCATVQKWLEDQIARQAERPKD  
VDPVLTSADVMKKRDEIIFYATPILTRPKPKPKVEQAGTETPKSGQETPNPPQGEAAKEEPAANEPPEMDVD  
MEGKTSRVIENEGARTTPSVVAFTHGERLVLPAKRQAVVNSQNTVFAFKRLIGRQYSDAEVKKDMEHWPFKVVA  
KPDGRPAVEVDNGGKKQLFSAEELSSMVLVKMRETAEQYLNKGVKHAVVTVPAYFNDAAQRQATKDAGQIAGLDVLR  
VINEPTAAALAYGLDRVDNAIVAYDLGGGTDFDISILEMQKGVFEVKSTNGDTHLGGGEDFDIVLVQHILNEFKKESGLD

WcHSP70-4

LASDPMAIQRIREAAEKAKIELSSTSQTEINLPFITADASGPKHINLKILRSHFESLVSPLIQRITIEPCKKALVDAGVKASEV  
NEVILVGMTRMPRVVETVKTIIFGREPSKGVNPDEAVAIGASIQGGVLAGNVTDILLDVTPLSLGIETLGGIMTKLIQR  
NTTIPTKKKTQTFSTAADGQTAIEVKVFQGERELVRDNKLLGNFNLTGIPPAPKGV PQIDITFDIDADGIVHVTARDKATN  
KDQSMTIASSSGLSDKDIERMVADAEQYAESDKERKLVEEANKADSVCHDTERAINEFKDQLDGAEKDKVTKLVAEL  
RELAVKGQAGDASITADTIREKLN ETQQASLGLFQKVYEKRNAEANA SESTTSEEKKEEKKEKKD  
MRFFRPLLLTSLV LASGVFAQDATDVPKQKHDYQSDVARLRKIVINSLYSHRDIFLRELISNANDALEKRLTSLTEKEV  
LSGAEE MNITIKALKDDDDGTGRIIITDTGIGMNPPEELTTLNLGTLARSGTSEFLARAESTDTTGAGNLIGAFGLGFYSSFLV  
ADR VYVASVAAKSSKNPSAQYVFESGADESSFEIYADPRGNTLGRGTEITLVLPDALEYTDPQRITELVDKHSSFSVF  
PIYLYTQRTEYVPVEEDEAEKKVENDAEEVDEDEATVEDAEDETKSQEPKMKEVTVDEWIHMNSQPPIWMRDPKTVS  
DEEYENFYQATFKDYEKPLAWHHFSGDSGSGVSFKAIYVPSHLDESYWQNPLLTNSRDIRLMVKRVFITSDLGEDALP

WcHSP90-1

KWASWVKVVVDAEDLPLNVSREMLQSTRFLKQLRSIILKHLLQVLTRTVEEDPEKWTQVQSVYGNVFKLGAVEDVK  
NRDKLVALTRFSTNQRNSTSLDEYLENKKKGQKQIFYLADMGSTTDHLAKSVFIEKLHARGYEVLLLTDP LDEIFVQNL  
RVWKRVSFQDVAKAGLRFGEDEMSPEEEKEEQKALTEEFKPLLDWLKKEAKDVVRDVVISNRLVTSSCAVVADMMG  
YTANIEKMMSSSHSGVRNPMHEFAKKQKIMEINPRSPTVQGLLRRVEQLPPEEEGQDLEAEELREVASVLIDGALVRS  
GFSVPDSNEFFVRVDRILRRSLGVSETAPTDTTVKPAPPVDPEPIEVEDPFQAEWPDYIPGSLRQPPQHEEQLVWEVEEID  
DEGNPVKHDEL

WcHSP90-2

MASESFGFQAEISQLLDLIINTFYSNKEIFLRELISNASDALDKIRYSSLTDP SVLETGKDLVIRIVPNKEARTLSIYDTGIG  
MTKADMVNNLGTIAKSGTKGFMEALSSGADISMIGQFGVGFYSAYLVAERVQVISKHNDDEQYIWESAAGGTFTITAD  
TVNPP LGRGTEIRLYLKEDQLEYLEEKRIKDIVKKHSEFISYPIQLAVVKEVEDDEEEAKEESEDKPKIEVEDEDKPKK  
TKKIKEKEIQNEELNKTKPIWTRNPSDITAEYAAFYKSLTNDWEEHLAVKHFSVEGQLEFKAILYIPKRAPFDLFETKK  
KRNNIKLYVRRVFIMDDCEDLIPEYLN FVKGIVDSEDLP LNISRETLQQNKILK VIRKNLVKKCLDLFTEIAEDKDNFSKF  
YEAFGKNIKLGIHEDSQNRSKLA EFLRFYSTKSSEEQTS LKDYITRMPEVQKNIIYLTGESLSSVKDSPFLEV LKKKGFE  
VLLLVDPIDEYAITQLKEFDGHKLVCVSKEGLELEETEEKNAREEEAKQFEDLCKTVKDALGDKVEKVVS NRITDSP  
CVLVTGQFGWSSNMERIMKAQALRDSSMSSY MASKKTLELNPHNAIVKELKKKVAEDKADKSVRDLTYLLFETALLT  
SGFSLDDPTSFAKRIHRMISLGLDVDEESAPAASSDDVP PAAEGASTSAMEEID

WcHSP100-1

MASSFNFDTKTQETLAAAIQLAKDYANAQVYPVHIAFALLNEGAGEQVPGGVNQSGHSLFRSVIERAGGDTTAVKRS  
LQKLIVRMPTQQPPDEISLSAALKVLRDAESLRKTMHDSYIAQDHLLAALIKDSTVAPILKEANLTEATLKTAIDQLR  
GNRRVESKNAEQGF DALQKYAVDLTSLAEEGKLPVIGRDNEIRR VIRILCRRTKNNPILLGEPGVGKSAIEGLAQ RIV  
NRDVPASLLGRLYSLDMGALMAGAKYKGEYEERIKSVLNEIEKASDEGTGVILFIDELHLMAGRGAEGGGMDAANL  
FKPLLARGKLCIGATT LAEYRKYIETDAALERRFAQVLVN EPSVPETISILRGIREKYEVHHGV RILDGALIQAA SLAHR  
YLTSRRLPDAAIDL VDEACASVRVTRETAPEAIDKLQRRKLELEVEIHALEREKDEASKERLALARKAIADVDDQLQPL

|            |                                                                                                                                                                                                                                                                                                                                                                                                                                                                                                                                                                                                                                                                                                                                                                                                                                                                                                                                                                                                                                                                                                                                                                                                                                                                                                                                                                                                                                                                                                                                                                                                                                                                                                                                                                                                                                                                                                                                                                                                                                                                                                                                                                                                                                                                                                                                                                                                                                                                                                                                                                                                                                                                                                                                                                                                                                                                                                                                                                                                                                                                                                                                                                                                                                                                                                                                                                                                                                                                                                                                                                                                                                                                                                       |
|------------|-------------------------------------------------------------------------------------------------------------------------------------------------------------------------------------------------------------------------------------------------------------------------------------------------------------------------------------------------------------------------------------------------------------------------------------------------------------------------------------------------------------------------------------------------------------------------------------------------------------------------------------------------------------------------------------------------------------------------------------------------------------------------------------------------------------------------------------------------------------------------------------------------------------------------------------------------------------------------------------------------------------------------------------------------------------------------------------------------------------------------------------------------------------------------------------------------------------------------------------------------------------------------------------------------------------------------------------------------------------------------------------------------------------------------------------------------------------------------------------------------------------------------------------------------------------------------------------------------------------------------------------------------------------------------------------------------------------------------------------------------------------------------------------------------------------------------------------------------------------------------------------------------------------------------------------------------------------------------------------------------------------------------------------------------------------------------------------------------------------------------------------------------------------------------------------------------------------------------------------------------------------------------------------------------------------------------------------------------------------------------------------------------------------------------------------------------------------------------------------------------------------------------------------------------------------------------------------------------------------------------------------------------------------------------------------------------------------------------------------------------------------------------------------------------------------------------------------------------------------------------------------------------------------------------------------------------------------------------------------------------------------------------------------------------------------------------------------------------------------------------------------------------------------------------------------------------------------------------------------------------------------------------------------------------------------------------------------------------------------------------------------------------------------------------------------------------------------------------------------------------------------------------------------------------------------------------------------------------------------------------------------------------------------------------------------------------------|
|            | <p>MAQYEA EKARGDEIQNVRRKIDELKAKADEAERRYDLATASDLRYALPDLQARLAQLEAKKAEEDVQAGVGS DTV</p> <p>TPEQIAEIVARWTNIPVTRLMSTEKEKLLKMERILGEQVVGQPEAVKAVANAIRLSRSGLRNAQRPIASFLMAGPSGTGK</p> <p>TLLSKTLATLLFDSPDAMIRIDGSEYSEKHSISRLIGAPPGYVGHDDQGGQLTEYIRRKPYISIVLIDIEIKASREFVTLFLQV</p> <p>LDDGRLTDGQGRIVDFRNTVIIMTSNLGAAFLNDMGEGAVKSETRELVMGAIRAHFPPEFINRIDEIVFRTLSQLRVNLKI</p> <p>VDLRLKEVQERLADKKMVL DIEPAAKQYLMSSGYSPIYGARPLNRAIQTELLNPLSVMILSDRIRDGETIRVRFDGPHN</p> <p>RLAIIPNHEAGADSMIDQDDIEDIEIEEMD</p> <p>MMADVQMDIPKYTIEYGRRIERTYDIAKEVQSSKVTPFHLLALLCGKELNLHNLENFVPDNPSLFWSALEDLEPEHGS</p> <p>AELVTTLWHVIQNEASKMDQPTSNAATSDGPAKLTRSFRKILSREVNQSHSNSRIGGTGTIEPSEELIAVFGNANPLVSI</p> <p>SGDDFAGPYHLLSVVGDDGVSNFLKDSQIDRQEFVRAVRRRRPPKITSKDDESFPHLT KYATNMCDMAREGKLNIEIG</p> <p>RDEEIRRVQILSRRSKNSAVLLGEPGVGKTAVAEGLAHRIVKGEVPQSLRGTLWSLDLGALFAGAGKGEYELRVKNVV</p> <p>EDVTRSQQSQSPAIIFIDELHLITVGKSPGGQNSGMDAANLLKPALARGQFRCIGATTLSYRQHIEKDGALERRFAPVIV</p> <p>DEPTIDEATTILRGIRERYEKHHNVWIMDQAIVTAVKLAHRYLTARRLPDSAVDLMDEACAAARVAQDMKPEAVDTLE</p> <p>QEISHVDAHIRALERDTHPDDEEALTEAKRRRVELEGKMKQLLRQQQNLKQWWEQMSHQRTLLQKKRDEIKRLGDG</p> <p>ASRTTANRLKDELRDLRGGLMALERQGPEIIDSISEFFGKNRHRVISRSSPDITPESIAEIVERATKIPVQRLLANEKSHLLQ</p> <p>LESVLSQQVVGQPEAVKAVAHAIQVSRTGLGNTNRPIASFLFTGPSGTGKTLMSKALAKELFGQEMAMVRIDGSEYSE</p> <p>GHSVSRLIGSPPGYVGYDQGGQLTEYVRRTPFCIVLLDEVEKACSEFLTLFLQVLDGRLTDGQGRLVDFRNCVIIMTSN</p> <p>VGAELSTTSGEITRSTREQVLQRFKDVRFPPPEFMNRIEEVVMFRTMSNEVMREILEKHLRELMQREGLKRLQGLDLDE</p> <p>NAKNWLIQVGISPHYGARPLARMIQRELLNPLSRCLLEETVHEGDLVLRCKPERDGLFIKSNREPAPPQHNGRNVGLR</p> <p>LRGS</p> <p>MSKTGSVSSSHISLHETSPPTPQLKSLISDELQQILSCSVQLADDTSNNYSSLHHIPLHIALALLYEGLTYRTSPWLHEPTK</p> <p>TWHVYPWERSLFWLVIGKAARNTLPISLDEHICHVTHPDRDTFIVQNSVQAIWNKVEGLSDHDLQATGDQDDDDPTY</p> <p>QSSRWNDSTRGLLSRAKEICHDKADEFIAPHVLLALLKDALVREILESQDLDPNILEDQIKGLRQRNITRSESLPRFSLL</p> <p>NQFATDLTEEIYDKIKRNLIDPVIGRNYEVRHIIAILSRCSKNNAVLLGDPGVGKTAIAEGLAYRIVKQEVPESSVVARVF</p> <p>NLDLGALLASTACKSAYERIVELILQEIAEHEERGIRVILFVDELSQITIGWRDDGTGLDAATLMKPFLSKGKLCRCVGC</p> <p>STFEDYRDSVEKDAALSRQFSAVFVCESTVPETVAILRGMKKGLEQHNNVILDDSIMAAASIAAQYFTHKRLPDAAID</p> <p>LVDEACAALKTAGNEQREKRMQLQRRQVLEMDIASLEREYDEDSTVKLTQALAQLSQVQQQLQQISISGERSASINS</p> <p>KLEELNVQIKQKERDMLQYGKAGQRAERLKCVELWKLKDARAEEMSALERLQSKQLDNVDESQRQTNDHASNSE</p> <p>EAKIVTKRDIVQAASWYRPPVHCSTWKNQDALAKFLETLPKMVGQEEAVDAVSSAIRCMMSGLTDPTRPVASFIFG</p> <p>GPAGSGKTFLAKELAKALLGSTSKLV SINAGDYNAPHTLTRLIGTPVCTGFDHGGQLTECVRRKPFSVILIREIENACPEF</p> <p>RLYIQRILDEGSTKD GAGKAVDFRNCVIITTGIGQINSKATFDEDEERKHYLEINEWFVSFEFLARIDELVVFRITADIIG</p> <p>HIIAARLEEISKQLTRLKLHLTVDDDEVQWYLEDQAWSADSGARHLEK VIRDEIIHPLAIRLLDDRDIDENWRVRLSIEEYD</p> <p>DGITIELLEPLPPVDLQSSGGSSDTETTTAPSPSASVNSLLESYEPRQPCDSVTGSLPDAQSVVPTEFIGSTFRPPIPQFRP</p> <p>QRLF</p> <p>MMGAYPDGDVARASLAQMTEISRRAEVAGMTFSATPASRQQGSQGPMSRIMAAAGLNVDAPVRPMSRQNALARIEEL</p> <p>ARNRPPSSQGQPAASGSGAGAVPAAQPQASGSGAAAGAGAGEGAFDAEAFLLGDAGSVGNYPGTMSHEGLQVFTV</p> <p>GHLMPKSTLEDANGNWAFDPNALAGVVMPTPQGMGGDPEQEGEGERKGPYPPIASFAEGEAGTSAATSGRPGSAQKL</p> <p>RVRRSTYVPGWAVPPKVLLVDDDAVSRRLSSKFLQVFGCTIDVAVDGVGAVNKMNLKYDLVLMDIVMPKLDGVSAT</p> <p>SLIRQFDHMTPIISMTSNSKPNIEIKYSSGMNDILPKPFTKDGLLDMLEKHLMLHKVIQTMQRVPRSVGIPPLNDAGFD</p> <p>QALAMQPAQSAGGFTLGDDDGKINPLAGMGLTDEQYTLILQNLVSGDSFMGVIGGIEESASGKRS LDSSDGRDAKRS</p> <p>RFEIVE</p> <p>MYVATPGFAPLLSAFQIYGFMRKVNLRNVDP AIDDPDASTWSHPTLNRHSPPPEVANFKRRVPPRVKPRKRDNEVPQP</p> <p>LPSARPQLNIGPMGMAQQPGSPRQGARARGFSAPGSFTPLTPQPGAPGWGTSYPRSTLPPLTVPEPPMASHAMYSQHS A</p> <p>HPLHPITPTDDAPTSSFTSPMSYTNSSRETMMMLPSPNGQYPYASDSATSWAFSPTSAASSHSSGSLSLNPSGVS SAYS</p> <p>NSSRPTPPQINTYTSYNGVQMSRGHHS AAPLSPESRPTSGYSSSMSSLPDPAESPNHYSHHDYSRPSSSHQHQGRPLT</p> |
| WcHSP100-2 |                                                                                                                                                                                                                                                                                                                                                                                                                                                                                                                                                                                                                                                                                                                                                                                                                                                                                                                                                                                                                                                                                                                                                                                                                                                                                                                                                                                                                                                                                                                                                                                                                                                                                                                                                                                                                                                                                                                                                                                                                                                                                                                                                                                                                                                                                                                                                                                                                                                                                                                                                                                                                                                                                                                                                                                                                                                                                                                                                                                                                                                                                                                                                                                                                                                                                                                                                                                                                                                                                                                                                                                                                                                                                                       |
| WcHSP100-3 |                                                                                                                                                                                                                                                                                                                                                                                                                                                                                                                                                                                                                                                                                                                                                                                                                                                                                                                                                                                                                                                                                                                                                                                                                                                                                                                                                                                                                                                                                                                                                                                                                                                                                                                                                                                                                                                                                                                                                                                                                                                                                                                                                                                                                                                                                                                                                                                                                                                                                                                                                                                                                                                                                                                                                                                                                                                                                                                                                                                                                                                                                                                                                                                                                                                                                                                                                                                                                                                                                                                                                                                                                                                                                                       |
| WcHSF-1    |                                                                                                                                                                                                                                                                                                                                                                                                                                                                                                                                                                                                                                                                                                                                                                                                                                                                                                                                                                                                                                                                                                                                                                                                                                                                                                                                                                                                                                                                                                                                                                                                                                                                                                                                                                                                                                                                                                                                                                                                                                                                                                                                                                                                                                                                                                                                                                                                                                                                                                                                                                                                                                                                                                                                                                                                                                                                                                                                                                                                                                                                                                                                                                                                                                                                                                                                                                                                                                                                                                                                                                                                                                                                                                       |
| WcHSF-2    |                                                                                                                                                                                                                                                                                                                                                                                                                                                                                                                                                                                                                                                                                                                                                                                                                                                                                                                                                                                                                                                                                                                                                                                                                                                                                                                                                                                                                                                                                                                                                                                                                                                                                                                                                                                                                                                                                                                                                                                                                                                                                                                                                                                                                                                                                                                                                                                                                                                                                                                                                                                                                                                                                                                                                                                                                                                                                                                                                                                                                                                                                                                                                                                                                                                                                                                                                                                                                                                                                                                                                                                                                                                                                                       |

WcHSF-3

PSSSRPPSSKSYNNAGSLSIRRARRHSQAMQPYPSPYAEHPPLSAGSDRPSSSPQPGDEHSSAIPRVRSMIQLPTVDGYGF  
SSSQSEFAYAAVDDGHAHQQQQHQHQHLYGVSGRSVRPSTSASSLSTASSAANTPGEFAPGTGEADINRCEYHSC  
CAAGRRRDACGLRYGGPGDHVADCVPYSRAHTVSPDFGFVQMNEHIPQYAKAGEM  
MDAIMQCPVLNHERFAREVLRWFKHQKFTSFVRQLNMYGFHKIPHLQQGVLKSDTDTEPWNFEHPHFHRGQPDLL  
CLIQKKQPANSTGDEPDIVDSHQSAPLAGNASQVLDINSIVNGIAAIKRHHQQAISADLNALKKSNDDLWEEATLTRQR  
HDKHQDTINRILKFLAGVFGNNTESINKNESGRPPSVVPRARQRLIGDGGFPKGKSVEIADVDEDDDEEVHMAHPQEG  
NKTPLAGKLPHDILQHTIYELYRLAGQTAAVEPTVESPMMSPPSPSAPPSEPFSTVSVDSTASGYTARPVTRPSEVLSRTST  
SNNSNFGSATEVPTRTTFTQNAARADATILPTALTSTPNAANASYSDNIWQTAFQQLNNPLQMQLMQAIAAQNSNI  
PPPDNSSMIHSQPSAQIAPYDQTYNDYNRYRNDLPVAAPPSQSSLPMLSAISNDAPPLELLHENNARLQKTYRDAVEIE  
ADMDVLQHSLNSLIHDLGMDPQVLIAQAQERDPPTGNIPGALLSNGGHANGVHANGFRPNEMDSDALMLGVAANGH  
QEEAAPDLFLESLNMGSPGTDGNMEYSDVTDHFNPSARIDGITVADASTEQLAAFLDEVSDTASPHVRSPEIKTTPAK  
RKSDVAGLAPSIVDVEKTAAAGPKSKRKR\*

WcHSF-4

MMGAARVLGLIEGRRARKGRTPNRLCHRPQIVPSHALCMLSSPREPMDAQYAPMPDHHFAPPAHAQWSQAAHLLPP  
PAPAPFPSPASPAPSLADQHYASYSHPPPAPQHGLGDSAVVRQIDRSSLSLNLSSLSVASPTNLSPINSPHPSTQPSHHVS  
PITPISPAAACALGPAHAHAQHLGQSFSFAPPEPGVRYDDAPQSSYDYTAGPARRGLSSRSSASDKSVPRKRSFPPGAL  
APSVEEQFDPAPADAGYDDVDMTYGALDAHSPVDGSTSGGEADDPMRAPDPPQALPPVGMLGKPLGTNNFVTKLYQ  
MINDPKSAQFINWTDLGTSFVVSNGEFSRTILGSHFKHNNFSSFVRQLNMYGFHKINRTTPRAQRTSADVQTFEFSHH  
KFLRARPDLLLEEIKRKALEPDPSVKQRVELPGEVAAQLREVREANHRLAGALHAERRRVARLAGLTKTLWDAVARSWP  
GSVPGFPFNDLLDAAESPNIYITSPSAHGGPPQHHPHFALLHPLSPGASPTAPEFPAFAHAHYDVHAPGLSAARYETALA  
TPLPPSPGPAGAGAGEPGEFGEDARVGAKRARTEGEGARRGTRARSDSAPLGYGLGAGWAGARPRSGSGLAVSAGGG  
QCASPSSGLAQGGMGALGFGRAGARREEVQSIGALSRQGGGQGGQGGQLPMLAIPGK

---

**Table S3.** Primer sequences used in this study.

| Number | Name                | Primer (5'-3')            | Usage   |
|--------|---------------------|---------------------------|---------|
| 1      | <i>GAPDH-F</i>      | TCGACAAGGCGAGCGGACAC      | qRT-PCR |
| 2      | <i>GAPDH-R</i>      | TGCACGATGCGTTGGAAATG      | qRT-PCR |
| 3      | <i>ACT-F</i>        | CATCCTTTGTATTCCCAACCGCTAT | qRT-PCR |
| 4      | <i>ACT-R</i>        | CTCGTCGCCAATGAAGAAATCG    | qRT-PCR |
| 5      | <i>qWcHSP100-1F</i> | AGCAGTCGGGTCATTCACTATTCC  | qRT-PCR |
| 6      | <i>qWcHSP100-1R</i> | ATCTCGTCTGGTGGTGGCTGTT    | qRT-PCR |
| 7      | <i>qWcHSP100-2F</i> | CTTTGTGCCCATAATCCCTC      | qRT-PCR |
| 8      | <i>qWcHSP100-2R</i> | CCATCGGAGGTAGCAGCATTT     | qRT-PCR |
| 9      | <i>qWcHSP100-3F</i> | TCGACAGTTCTCAGCGGTAT      | qRT-PCR |
| 10     | <i>qWcHSP100-3R</i> | CGTTATGGTGTGTTCTAATCC     | qRT-PCR |
| 11     | <i>qWcHSP90-1F</i>  | CACCATAAAGGCTCTAAAGGACGAT | qRT-PCR |
| 12     | <i>qWcHSP90-1R</i>  | AATGTGCCAGGTTGGTTGTTAG    | qRT-PCR |
| 13     | <i>qWcHSP90-2F</i>  | ACCTCGTGATCCGCATTGTC      | qRT-PCR |
| 14     | <i>qWcHSP90-2R</i>  | CTGAGAGCCTCCATAAAGCC      | qRT-PCR |
| 15     | <i>qWcHSP70-1F</i>  | TGGCCTTTCAAGGTTGTTTCT     | qRT-PCR |
| 16     | <i>qWcHSP70-1R</i>  | CAAGGTATGATTGGCGGTC       | qRT-PCR |
| 17     | <i>qWcHSP70-2F</i>  | TGAGCGTACCCAGTGCCGTGAC    | qRT-PCR |
| 18     | <i>qWcHSP70-2R</i>  | AAGGCGGCCAACGGAGTTAGTG    | qRT-PCR |
| 19     | <i>qWcHSP70-3F</i>  | AGACCTCCAACCTCCGCAACAC    | qRT-PCR |
| 20     | <i>qWcHSP70-3R</i>  | GCCAACATCTATCAGCGTAGCATT  | qRT-PCR |
| 21     | <i>qWcHSP70-4F</i>  | CAAGAAGGCGTTGGTAGATG      | qRT-PCR |
| 22     | <i>qWcHSP70-4R</i>  | CTGGGCTCACGACCGAAGAT      | qRT-PCR |
| 23     | <i>qWcHSP60-F</i>   | CTTTGGCGACAACCGCAAGTC     | qRT-PCR |
| 24     | <i>qWcHSP60-R</i>   | GTGTCTCTCTTTGTGATGGTGATG  | qRT-PCR |
| 25     | <i>qWcsHSP-1F</i>   | CCGTTTTACACCCTCGCCGACTTT  | qRT-PCR |
| 26     | <i>qWcsHSP-1R</i>   | CGCGGTTACAGCGTTTGCTTGC    | qRT-PCR |
| 27     | <i>qWcsHSP-2F</i>   | CCTCCTTGACGACGCCCTTAC     | qRT-PCR |
| 28     | <i>qWcsHSP-2R</i>   | TTGCTCTGCCCCGATACAGTG     | qRT-PCR |
| 29     | <i>qWcsHSP-3F</i>   | TTTCTACTCCCTCGCTGACTTCG   | qRT-PCR |
| 30     | <i>qWcsHSP-3R</i>   | CTGCACGTTCTCCTTGCTTATCC   | qRT-PCR |
| 31     | <i>qWcsHSP-4F</i>   | GGCTCTGACTGGTTGTGGGC      | qRT-PCR |
| 32     | <i>qWcsHSP-4R</i>   | GGATGATGACAGCAAGTTGGTGG   | qRT-PCR |
| 33     | <i>qWcsHSP-5F</i>   | AGGGAACCAGGCGGTAACAT      | qRT-PCR |
| 34     | <i>qWcsHSP-5R</i>   | ACGGCAATCTGGTGGAACAAG     | qRT-PCR |
| 35     | <i>qWcsHSP-6F</i>   | GTCGCTCAGCCGCTTCCTTTAC    | qRT-PCR |
| 36     | <i>qWcsHSP-6R</i>   | CGTCGCAGTGACCGTGTGG       | qRT-PCR |
| 37     | <i>qWcHSF-1F</i>    | TACGACCTGGTGTTGATGGAC     | qRT-PCR |
| 38     | <i>qWcHSF-1R</i>    | CTTGATGATCTCGTTCGGCT      | qRT-PCR |
| 39     | <i>qWcHSF-2F</i>    | GTCCACCTCGGCATCGTCCCTAT   | qRT-PCR |
| 40     | <i>qWcHSF-2R</i>    | GCCGCACAACAGGAATGGTACTCAC | qRT-PCR |
| 41     | <i>qWcHSF-3F</i>    | TTGAAAAGCGATACAGACACCG    | qRT-PCR |
| 42     | <i>qWcHSF-3R</i>    | CGCTGAATGAGGCACAATAAGT    | qRT-PCR |

|    |              |                                               |                                |
|----|--------------|-----------------------------------------------|--------------------------------|
| 43 | qWcHSF-4F    | CACCATCCTCGGCTCGCACTTC                        | qRT-PCR                        |
| 44 | qWcHSF-4R    | CGGGGCGTCCGGTTGATCTTGT                        | qRT-PCR                        |
| 45 | WcHSP100-1F  | ATGGCTTCGAGCTTTAACTTTACCG                     | Cloning gene                   |
| 46 | WcHSP100-1R  | TCAGTCCATTTCTTCGATCTCGATG                     | Cloning gene                   |
| 47 | WcHSP90-1F   | ATGCGGTCTTCCGCCCGCTGTTG                       | Cloning gene                   |
| 48 | WcHSP90-1R   | TCACAGCTCATCATGTTTTACGGGGTT                   | Cloning gene                   |
| 49 | WcHSP70-1F   | CTAGTCGATCTCCTCCATCGCCGACGT                   | Cloning gene                   |
| 50 | WcHSP70-1R   | TCACAGTTCGTCATGAGAGTGAAT                      | Cloning gene                   |
| 51 | WcHSP70-2F   | ATGGAGGACGTGTTTCGACGG                         | Cloning gene                   |
| 52 | WcHSP70-2R   | TCACCGGATACCAGCAGTGGC                         | Cloning gene                   |
| 53 | WcHSP70-4F   | ATGGAGGGCAAGACGTCGCG                          | Cloning gene                   |
| 54 | WcHSP70-4R   | TTAGTCCTTCTTCTCCTCCTTCTT                      | Cloning gene                   |
| 56 | mWcHSP100-1F | ACAGCCCAGATCTGGGTACCATGGCTTCGAGCTTTAACTTTACCG | Recombination to<br>pET32a (+) |
| 57 | mWcHSP100-1R | TGGTGCTCGAGTGCGGCCGCGTCCATTTCTTCGATCTCGATG    | Recombination to<br>pET32a (+) |
| 58 | mWcHSP90-1F  | ACAGCCCAGATCTGGGTACCATGCGGTTCTTCCGCCCGCTGTTG  | Recombination to<br>pET32a (+) |
| 59 | mWcHSP90-1R  | TGGTGCTCGAGTGCGGCCGCCAGCTCATCATGTTTACGGGGTT   | Recombination to<br>pET32a (+) |
| 60 | mWcHSP70-1F  | ACAGCCCAGATCTGGGTACCATGTCCCTCCCCCGTCGACCGAC   | Recombination to<br>pET32a (+) |
| 61 | mWcHSP70-1R  | TGGTGCTCGAGTGCGGCCGCCAGTTCGTCATGAGAGTGAAT     | Recombination to<br>pET32a (+) |
| 62 | mWcHSP70-2F  | ACAGCCCAGATCTGGGTACCATGGAGGACGTGTTTCGACGG     | Recombination to<br>pET32a (+) |
| 63 | mWcHSP70-2R  | TGGTGCTCGAGTGCGGCCGCCGGATACCAGCAGTGGCTT       | Recombination to<br>pET32a (+) |
| 64 | mWcHSP70-4F  | ACAGCCCAGATCTGGGTACCATGGAGGGCAAGACGTCGCG      | Recombination to<br>pET32a (+) |
| 65 | mWcHSP70-4R  | TGGTGCTCGAGTGCGGCCGCGTCCTTCTTCTCCTCCTTCTT     | Recombination to<br>pET32a (+) |

---
